# Supplementary material
Source: MDPI journal article supplement (https://www.mdpi.com/2077-0472/14/4/552)
Supplement: s1 [file s1]

**Table S1.** *F*-test statistics in ANOVA.

| Parameter         | Uniformity (%)  | Bulk density (kg hL <sup>-1</sup> ) | Hardness        | Vitreousness (%) | Flour extraction rate (%) | Total protein content (g kg <sup>-1</sup> DM) | Wet gluten content (%) | Zeleny sedimentation index (mL) | Falling number (s) |
|-------------------|-----------------|-------------------------------------|-----------------|------------------|---------------------------|-----------------------------------------------|------------------------|---------------------------------|--------------------|
| Y                 | 160.109**       | 13.219**                            | 46.110**        | 103.775**        | 18.614**                  | 225.001**                                     | 294.580**              | 3.480*                          | 73.004**           |
| SDE               | 3.456*          | 47.147**                            | 5.064**         | 50.247**         | 7.481**                   | 47.394**                                      | 4.638**                | 3.312*                          | 3.583*             |
| SDY               | 5.982**         | 0.901 <i>ns</i>                     | 0.080 <i>ns</i> | 4.010*           | 0.120 <i>ns</i>           | 24.853**                                      | 9.278**                | 1.611 <i>ns</i>                 | 1.260 <i>ns</i>    |
| N                 | 0.908 <i>ns</i> | 0.001 <i>ns</i>                     | 3.967*          | 3.283*           | 5.064**                   | 24.395**                                      | 8.596*                 | 3.832*                          | 0.194 <i>ns</i>    |
| Y × SDE           | 4.991**         | 4.817*                              | 2.317 <i>ns</i> | 11.070**         | 0.173 <i>ns</i>           | 88.440**                                      | 22.289**               | 2.409 <i>ns</i>                 | 1.908 <i>ns</i>    |
| Y × SDY           | 2.410 <i>ns</i> | 1.383 <i>ns</i>                     | 1.914 <i>ns</i> | 1.437 <i>ns</i>  | 1.449 <i>ns</i>           | 9.115**                                       | 1.394**                | 0.293 <i>ns</i>                 | 0.329 <i>ns</i>    |
| Y × N             | 1.342 <i>ns</i> | 0.240 <i>ns</i>                     | 0.134 <i>ns</i> | 1.403 <i>ns</i>  | 0.546 <i>ns</i>           | 1.964 <i>ns</i>                               | 1.054 <i>ns</i>        | 0.311 <i>ns</i>                 | 0.622 <i>ns</i>    |
| SDE × SDY         | 0.548 <i>ns</i> | 0.133 <i>ns</i>                     | 0.353 <i>ns</i> | 2.411 <i>ns</i>  | 2.412 <i>ns</i>           | 6.700**                                       | 3.1420**               | 0.966 <i>ns</i>                 | 0.769 <i>ns</i>    |
| SDE × N           | 1.636 <i>ns</i> | 0.176 <i>ns</i>                     | 0.109 <i>ns</i> | 1.444 <i>ns</i>  | 0.222 <i>ns</i>           | 0.266 <i>ns</i>                               | 0.097 <i>ns</i>        | 0.254 <i>ns</i>                 | 0.096 <i>ns</i>    |
| SDY × N           | 1.335 <i>ns</i> | 0.091 <i>ns</i>                     | 0.804 <i>ns</i> | 0.801 <i>ns</i>  | 0.560 <i>ns</i>           | 0.822 <i>ns</i>                               | 1.805 <i>ns</i>        | 0.391 <i>ns</i>                 | 0.659 <i>ns</i>    |
| Y × SDE × SDY     | 1.031 <i>ns</i> | 0.145 <i>ns</i>                     | 1.201 <i>ns</i> | 1.772 <i>ns</i>  | 0.866 <i>ns</i>           | 1.546 <i>ns</i>                               | 1.238 <i>ns</i>        | 1.007 <i>ns</i>                 | 0.499 <i>ns</i>    |
| Y × SDE × N       | 0.867 <i>ns</i> | 0.139 <i>ns</i>                     | 0.453 <i>ns</i> | 0.535 <i>ns</i>  | 0.444 <i>ns</i>           | 0.280 <i>ns</i>                               | 0.650 <i>ns</i>        | 0.244 <i>ns</i>                 | 0.435 <i>ns</i>    |
| Y × SDY × N       | 1.304 <i>ns</i> | 0.155 <i>ns</i>                     | 0.397 <i>ns</i> | 0.805 <i>ns</i>  | 0.101 <i>ns</i>           | 0.281 <i>ns</i>                               | 1.038 <i>ns</i>        | 0.462 <i>ns</i>                 | 0.811 <i>ns</i>    |
| SDE × SDY × N     | 0.966 <i>ns</i> | 0.109 <i>ns</i>                     | 0.233 <i>ns</i> | 0.411 <i>ns</i>  | 0.833 <i>ns</i>           | 1.224 <i>ns</i>                               | 0.530 <i>ns</i>        | 0.181 <i>ns</i>                 | 1.958 <i>ns</i>    |
| Y × SDE × SDY × N | 1.349 <i>ns</i> | 0.077 <i>ns</i>                     | 0.702 <i>ns</i> | 0.475 <i>ns</i>  | 0.657 <i>ns</i>           | 1.521 <i>ns</i>                               | 0.874 <i>ns</i>        | 0.293 <i>ns</i>                 | 1.418 <i>ns</i>    |

\*significant at  $p \leq 0.05$ ; \*\*significant at  $p \leq 0.01$ ; *ns* – not significant; Y- growing season; SDE – sowing date; SDY – sowing density; N – split spring N rate.

**Table S2.** Pearson's correlation coefficients denoting the relationship between wheat grain parameters.

| Parameter                                     | Bulk density<br>(kg hL <sup>-1</sup> ) | Hardness | Vitreousness<br>(%) | Flour<br>extraction rate<br>(%) | Total protein<br>content<br>(g kg <sup>-1</sup> DM) | Wet gluten<br>content (%) | Zeleny<br>sedimentation<br>index (mL) | Falling<br>number<br>(s) |
|-----------------------------------------------|----------------------------------------|----------|---------------------|---------------------------------|-----------------------------------------------------|---------------------------|---------------------------------------|--------------------------|
| Grain uniformity (%)                          | -0.05                                  | -0.40*   | -0.33               | -0.19                           | -0.02                                               | -0.49*                    | -0.07                                 | -0.34                    |
| Bulk density (kg hL <sup>-1</sup> )           |                                        | 0.18     | 0.30                | 0.15                            | 0.22                                                | 0.06                      | 0.09                                  | 0.19                     |
| Hardness                                      |                                        |          | 0.31                | 0.20                            | 0.03                                                | 0.35                      | 0.12                                  | 0.36                     |
| Vitreousness (%)                              |                                        |          |                     | 0.35                            | 0.31                                                | 0.57**                    | 0.27                                  | 0.37                     |
| Flour extraction rate yield (%)               |                                        |          |                     |                                 | 0.21                                                | 0.30                      | 0.13                                  | 0.24                     |
| Total protein content (g kg <sup>-1</sup> DM) |                                        |          |                     |                                 |                                                     | 0.16                      | 0.17                                  | 0.25                     |
| Wet gluten content (%)                        |                                        |          |                     |                                 |                                                     |                           | 0.31                                  | 0.41*                    |
| Zeleny sedimentation index (mL)               |                                        |          |                     |                                 |                                                     |                           |                                       | 0.08                     |

\*significant at  $p \leq 0.05$ ; \*\*significant at  $p \leq 0.01$ .
